# Supplementary material for: Trends in Nicotine Product Use Among US Adolescents, 1999-2020
Source: PubMed Central journal article supplement (PMC8387850; doi:10.1001/jamanetworkopen.2021.18788), 2021-08-25
Supplement: jamanetwopen-e2118788-s001.pdf [file jamanetwopen-e2118788-s001.pdf]

## Supplementary Online Content

Sun R, Mendez D, Warner KE. Trends in nicotine product use among US adolescents, 1999-2020. *JAMA Netw Open.* 2021;4(8):e2118788.  
doi:10.1001/jamanetworkopen.2021.18788

**eFigure 1.** Mean Nicotine Product Days (NPDs), Capped at 30 Days and Uncapped

**eFigure 2.** Mean Nicotine Product Days (NPDs) by Tobacco Product Type, Capped at 30 Days and Uncapped

**eFigure 3.** Mean Nicotine Product Days (NPDs) and Mean NPDs Estimated by Dominant Product Use

**eFigure 4.** Mean Nicotine Product Days (NPDs) Among Nicotine Users

**eTable 1.** Mean Risk-Adjusted Nicotine Product Days (NPDs) for Middle School Students

**eTable 2.** Mean Risk-Adjusted Nicotine Product Days (NPDs) for High School Students

This supplementary material has been provided by the authors to give readers additional information about their work.

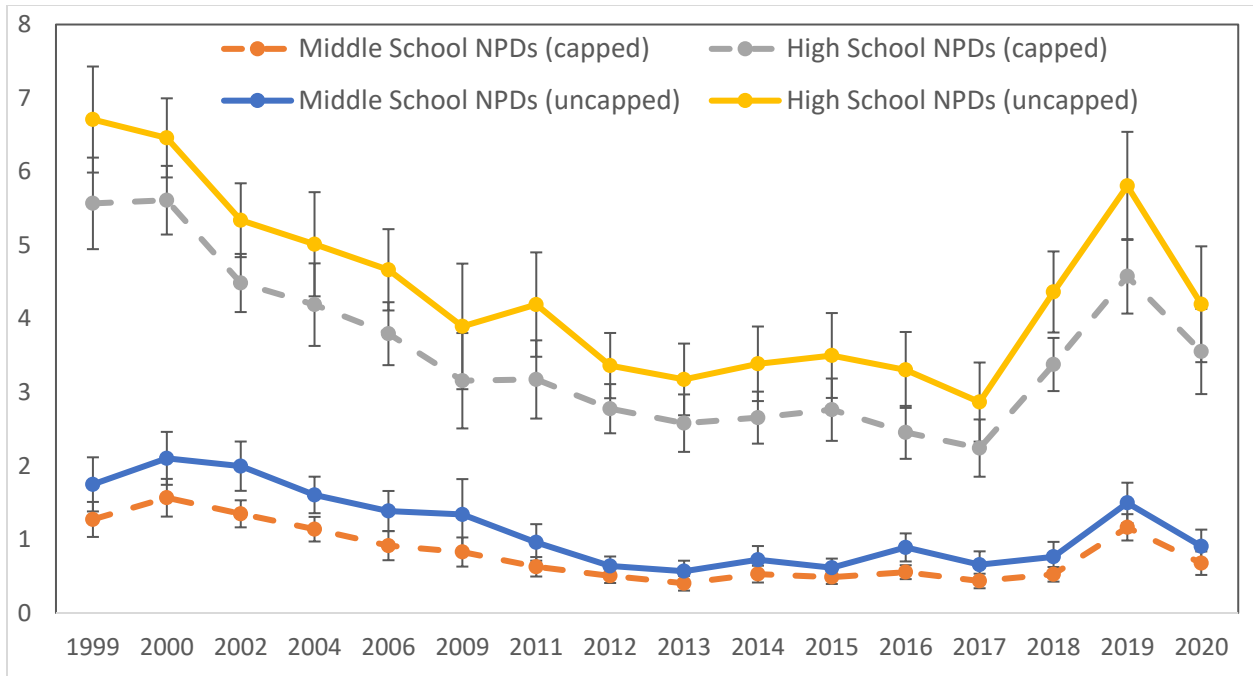

**eFigure 1.** Mean Nicotine Product Days (NPDs), Capped at 30 Days (dashed) and Uncapped (solid).

*Mean NPDs are 98.6% correlated for middle school students and 99.2% correlated for high school students.*

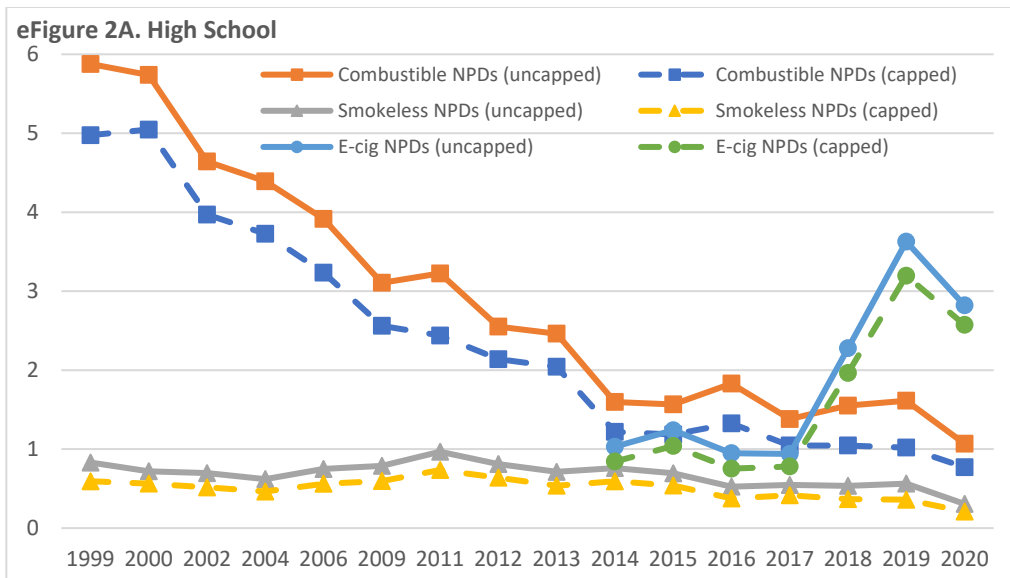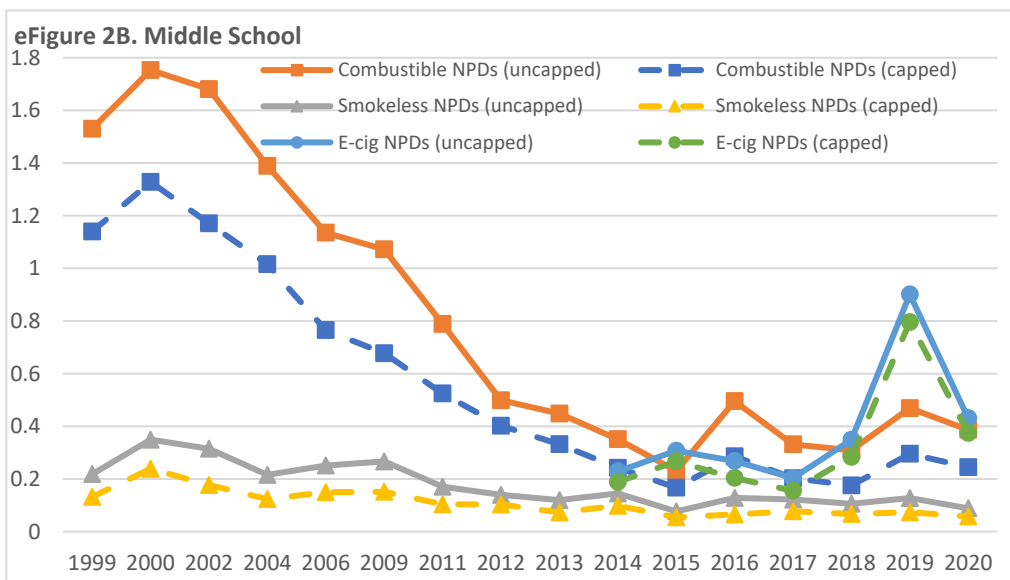

**eFigure 2.** Mean Nicotine Product Days (NPDs) by Tobacco Product Type, Capped at 30 Days (dashed) and Uncapped (solid).

*Combustible tobacco includes cigarettes, cigars, hookahs, bidis and kreteks in available years.*

*Smokeless tobacco includes chewing tobacco, snuff, and dip. For high school students, mean*

*combustible NPDs (capped and uncapped) are 99.8% correlated, mean smokeless NPDs 98.6%*

*and mean e-cig NPDs 99.9% correlated. For middle school students, these correlations are 99.4%,*

*97.7% and 99.9%.*

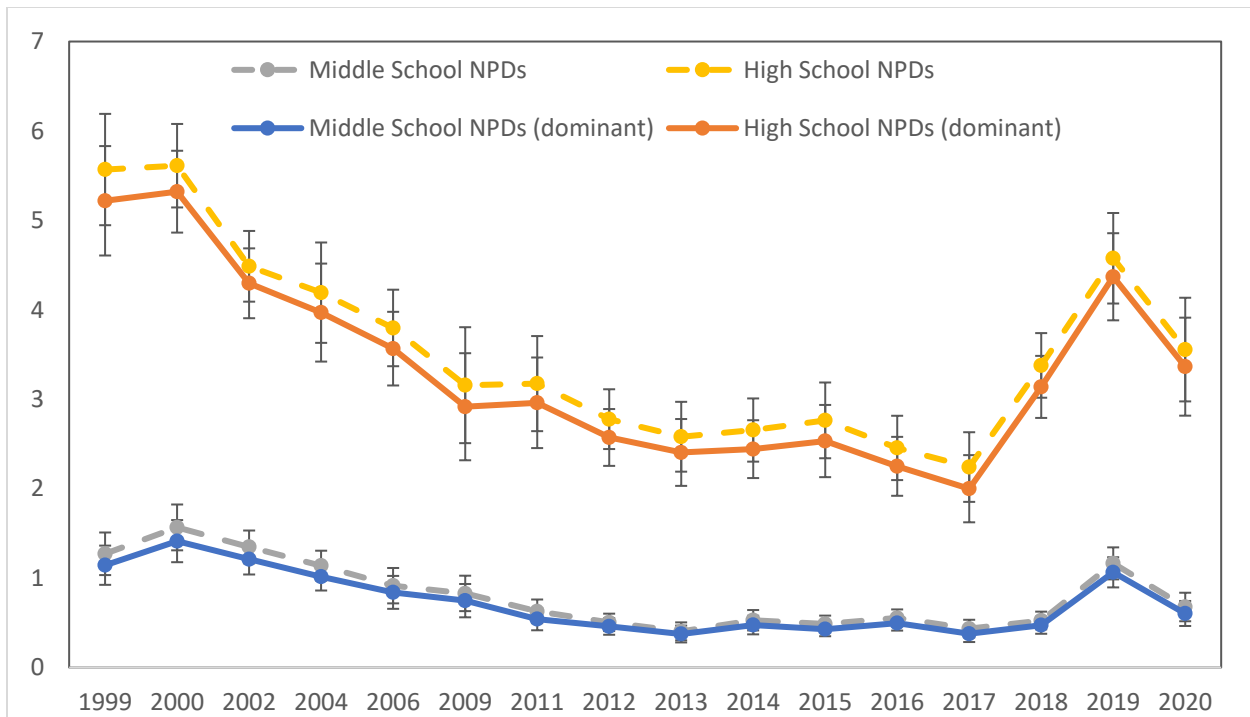

**eFigure 3.** Mean Nicotine Product Days (NPDs) (dashed) and Mean NPDs Estimated by Dominant Product Use (solid).

*Mean NPDs for both middle school and high school are 99.9% correlated.*

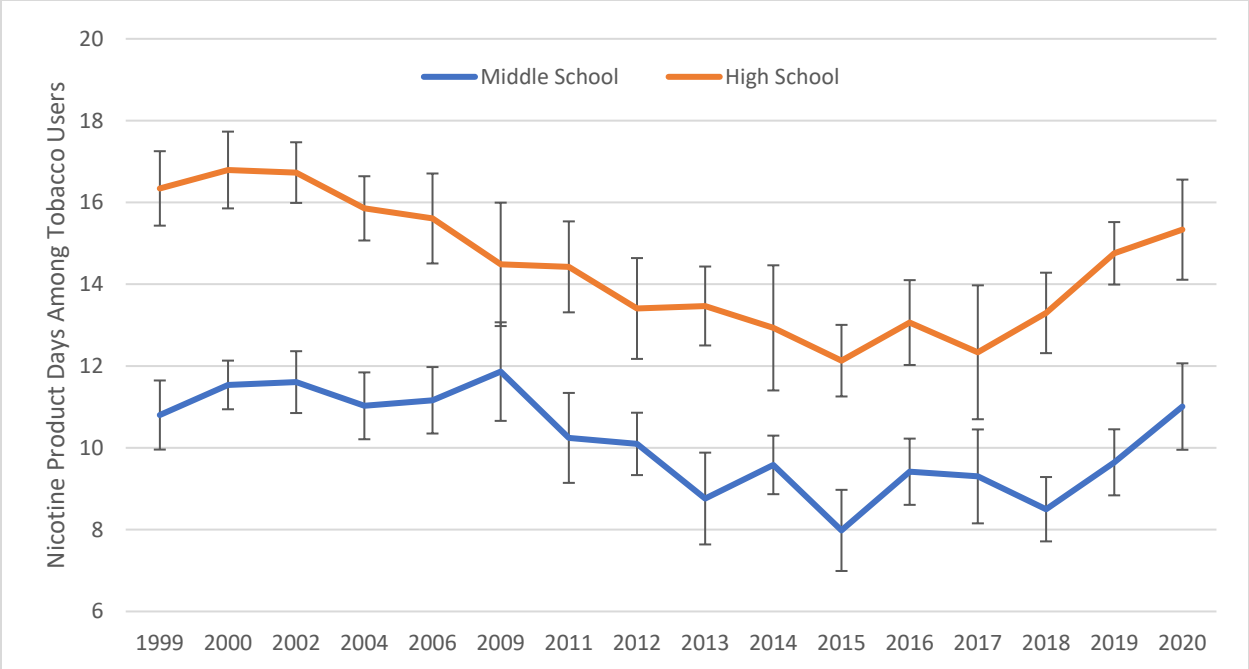

**eFigure 4.** Mean Nicotine Product Days (NPDs) Among Nicotine Users.

**eTable 1.** Mean Risk-Adjusted Nicotine Product Days (NPDs) for Middle School Students

| Year | Mean risk-adjusted NPDs (95% CI) |                     |                     |                     |                     |
|------|----------------------------------|---------------------|---------------------|---------------------|---------------------|
|      | E-cigarette risk weight          |                     |                     |                     |                     |
|      | 0.10                             | 0.25                | 0.50                | 0.75                | 1.0                 |
| 1999 | 1.55<br>(1.25,1.86)              | 1.55<br>(1.25,1.86) | 1.55<br>(1.25,1.86) | 1.55<br>(1.25,1.86) | 1.55<br>(1.25,1.86) |
| 2000 | 1.79<br>(1.51,2.07)              | 1.79<br>(1.51,2.07) | 1.79<br>(1.51,2.07) | 1.79<br>(1.51,2.07) | 1.79<br>(1.51,2.07) |
| 2002 | 1.71<br>(1.44,1.99)              | 1.71<br>(1.44,1.99) | 1.71<br>(1.44,1.99) | 1.71<br>(1.44,1.99) | 1.71<br>(1.44,1.99) |
| 2004 | 1.41<br>(1.19,1.64)              | 1.41<br>(1.19,1.64) | 1.41<br>(1.19,1.64) | 1.41<br>(1.19,1.64) | 1.41<br>(1.19,1.64) |
| 2006 | 1.16<br>(0.92,1.40)              | 1.16<br>(0.92,1.40) | 1.16<br>(0.92,1.40) | 1.16<br>(0.92,1.40) | 1.16<br>(0.92,1.40) |
| 2009 | 1.10<br>(0.73,1.47)              | 1.10<br>(0.73,1.47) | 1.10<br>(0.73,1.47) | 1.10<br>(0.73,1.47) | 1.10<br>(0.73,1.47) |
| 2011 | 0.81<br>(0.60,1.01)              | 0.81<br>(0.60,1.01) | 0.81<br>(0.60,1.01) | 0.81<br>(0.60,1.01) | 0.81<br>(0.60,1.01) |
| 2012 | 0.51<br>(0.41,0.62)              | 0.51<br>(0.41,0.62) | 0.51<br>(0.41,0.62) | 0.51<br>(0.41,0.62) | 0.51<br>(0.41,0.62) |
| 2013 | 0.46<br>(0.34,0.58)              | 0.46<br>(0.34,0.58) | 0.46<br>(0.34,0.58) | 0.46<br>(0.34,0.58) | 0.46<br>(0.34,0.58) |
| 2014 | 0.39<br>(0.26,0.52)              | 0.42<br>(0.28,0.56) | 0.48<br>(0.32,0.64) | 0.54<br>(0.36,0.71) | 0.59<br>(0.40,0.79) |
| 2015 | 0.27<br>(0.20,0.34)              | 0.32<br>(0.24,0.40) | 0.39<br>(0.30,0.49) | 0.47<br>(0.36,0.58) | 0.55<br>(0.42,0.67) |
| 2016 | 0.53<br>(0.40,0.67)              | 0.58<br>(0.44,0.71) | 0.64<br>(0.49,0.79) | 0.71<br>(0.55,0.87) | 0.78<br>(0.60,0.95) |
| 2017 | 0.36<br>(0.24,0.49)              | 0.39<br>(0.26,0.53) | 0.44<br>(0.30,0.59) | 0.50<br>(0.34,0.65) | 0.55<br>(0.38,0.72) |
| 2018 | 0.35<br>(0.22,0.49)              | 0.41<br>(0.26,0.55) | 0.49<br>(0.33,0.66) | 0.58<br>(0.40,0.77) | 0.67<br>(0.46,0.87) |
| 2019 | 0.57<br>(0.42,0.73)              | 0.71<br>(0.53,0.89) | 0.93<br>(0.71,1.15) | 1.16<br>(0.90,1.41) | 1.38<br>(1.09,1.68) |
| 2020 | 0.44<br>(0.30,0.58)              | 0.50<br>(0.35,0.66) | 0.61<br>(0.43,0.79) | 0.72<br>(0.51,0.93) | 0.83<br>(0.59,1.06) |

**eTable 2.** Mean Risk-Adjusted Nicotine Product Days (NPDs) for High School Students

| Year | Mean risk-adjusted NPDs (95% CI) |                     |                     |                     |                     |
|------|----------------------------------|---------------------|---------------------|---------------------|---------------------|
|      | E-cigarette risk weight          |                     |                     |                     |                     |
|      | 0.10                             | 0.25                | 0.50                | 0.75                | 1.0                 |
| 1999 | 5.96<br>(5.35,6.57)              | 5.96<br>(5.35,6.57) | 5.96<br>(5.35,6.57) | 5.96<br>(5.35,6.57) | 5.96<br>(5.35,6.57) |
| 2000 | 5.81<br>(5.34,6.28)              | 5.81<br>(5.34,6.28) | 5.81<br>(5.34,6.28) | 5.81<br>(5.34,6.28) | 5.81<br>(5.34,6.28) |
| 2002 | 4.71<br>(4.29,5.13)              | 4.71<br>(4.29,5.13) | 4.71<br>(4.29,5.13) | 4.71<br>(4.29,5.13) | 4.71<br>(4.29,5.13) |
| 2004 | 4.45<br>(3.85,5.06)              | 4.45<br>(3.85,5.06) | 4.45<br>(3.85,5.06) | 4.45<br>(3.85,5.06) | 4.45<br>(3.85,5.06) |
| 2006 | 3.99<br>(3.53,4.46)              | 3.99<br>(3.53,4.46) | 3.99<br>(3.53,4.46) | 3.99<br>(3.53,4.46) | 3.99<br>(3.53,4.46) |
| 2009 | 3.19<br>(2.55,3.82)              | 3.19<br>(2.55,3.82) | 3.19<br>(2.55,3.82) | 3.19<br>(2.55,3.82) | 3.19<br>(2.55,3.82) |
| 2011 | 3.32<br>(2.77,3.88)              | 3.32<br>(2.77,3.88) | 3.32<br>(2.77,3.88) | 3.32<br>(2.77,3.88) | 3.32<br>(2.77,3.88) |
| 2012 | 2.63<br>(2.28,2.99)              | 2.63<br>(2.28,2.99) | 2.63<br>(2.28,2.99) | 2.63<br>(2.28,2.99) | 2.63<br>(2.28,2.99) |
| 2013 | 2.53<br>(2.16,2.91)              | 2.53<br>(2.16,2.91) | 2.53<br>(2.16,2.91) | 2.53<br>(2.16,2.91) | 2.53<br>(2.16,2.91) |
| 2014 | 1.78<br>(1.49,2.06)              | 1.93<br>(1.61,2.25) | 2.19<br>(1.80,2.58) | 2.45<br>(1.99,2.90) | 2.70<br>(2.19,3.22) |
| 2015 | 1.76<br>(1.41,2.11)              | 1.95<br>(1.56,2.34) | 2.26<br>(1.81,2.71) | 2.57<br>(2.06,3.08) | 2.88<br>(2.31,3.45) |
| 2016 | 1.98<br>(1.57,2.38)              | 2.12<br>(1.69,2.55) | 2.36<br>(1.88,2.83) | 2.59<br>(2.08,3.11) | 2.83<br>(2.27,3.39) |
| 2017 | 1.53<br>(1.24,1.82)              | 1.67<br>(1.34,2.00) | 1.91<br>(1.52,2.29) | 2.14<br>(1.70,2.58) | 2.38<br>(1.88,2.87) |
| 2018 | 1.83<br>(1.54,2.12)              | 2.17<br>(1.84,2.51) | 2.74<br>(2.33,3.16) | 3.31<br>(2.82,3.81) | 3.88<br>(3.31,4.45) |
| 2019 | 2.03<br>(1.57,2.49)              | 2.58<br>(2.05,3.11) | 3.48<br>(2.84,4.12) | 4.39<br>(3.64,5.14) | 5.30<br>(4.43,6.16) |
| 2020 | 1.38<br>(1.02,1.75)              | 1.81<br>(1.37,2.24) | 2.51<br>(1.95,3.07) | 3.22<br>(2.54,3.90) | 3.92<br>(3.12,4.72) |
